# Supplementary material
Source: PubMed Central journal article supplement (PMC4944410)
Supplement: supp_tpc.16.00078_TPC2016-00078-RAR3_Supplemental_Movie_Legends.pdf [file supp_tpc.16.00078_TPC2016-00078-RAR3_Supplemental_Movie_Legends.pdf]

**Supplemental Movie Legends.** Brief Description of Supplemental Movies 1-5

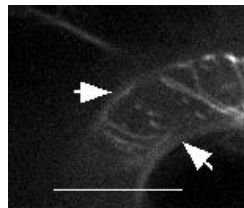

**Supplemental Movie 1:** Time-series movie displaying the severing events of single filament in Col-0 guard cell. Still images for this cell are shown in Figure 4A. Images were acquired every 2 s and were compressed into a 4 s movie with a play rate of 7 frames per second. The actin filament that underwent severing was marked with white arrows. Scale bar = 5  $\mu\text{m}$ .

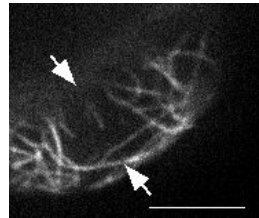

**Supplemental Movie 2:** Time-series movie displaying the severing events of single filaments in *ckl2* mutant guard cell. Still images for this cell are shown in Figure 4A. Images were acquired every 2 s and were compressed into a 3 s movie with a play rate of 4 frames per second. The actin filament that underwent severing was marked with white arrows. Scale bar = 5  $\mu\text{m}$ .

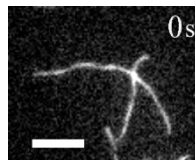

**Supplemental Movie 3:** Time-series movie of actin filament severing in the absence of ADF4. Same time series are shown in Figure 6Ba. Images were taken every 3 s for 5 min and were compressed into 9 s movie. Scale bar = 5  $\mu\text{m}$ .

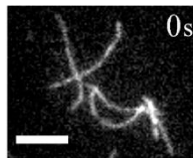

**Supplemental Movie 4:** Time-series movie of actin filament severing in the presence of 500 nM non-phosphorylated ADF4. Same time series are shown in Figure 6Bb. Images were taken every 3 s for 5 min and were compressed into 9 s movie. Red scissor indicates severing event. Scale bar = 5  $\mu$ m.

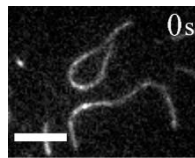

**Supplemental Movie 5:** Time-series movie of actin filament severing in the presence of 500 nM CKL2-phosphorylated ADF4. Same time series are shown in Figure 6Fc. Images were taken every 3 s for 5 min and were compressed into 9 s movie. Red scissor indicates severing event. Scale bar = 5  $\mu$ m.
